# Supplementary material for: Pulmonary Tuberculosis and Risk of Lung Cancer: A Systematic Review and Meta-Analysis
Source: MDPI journal article supplement (doi:10.3390/jcm11030765), 2022-01-30
Supplement: s1 [file s1]

## Supplementary material

**Table S1. Full search strategy.** Search was performed on August 30, 2020.

| PubMed                                                                                                                                                                                                                                                                                                                                                                                                                                                                                                                                                                                                                                                                                                                                                                                                                                                                                                                                                              |
|---------------------------------------------------------------------------------------------------------------------------------------------------------------------------------------------------------------------------------------------------------------------------------------------------------------------------------------------------------------------------------------------------------------------------------------------------------------------------------------------------------------------------------------------------------------------------------------------------------------------------------------------------------------------------------------------------------------------------------------------------------------------------------------------------------------------------------------------------------------------------------------------------------------------------------------------------------------------|
| (tb[tiab] OR tuberculo*[tiab] OR mycobacterium[tiab] OR "Tuberculosis"[Mesh])<br>AND<br>("Lung cancer*[tiab] OR "Lung tumor*[tiab] OR "Lung tumour*[tiab] OR "lung neoplasm*[tiab] OR "lung carcinoma"[tiab] OR NSCLC[tiab] OR SCLC[tiab] OR "lung adenocarcinoma"[tiab] OR "Lung Neoplasms"[Mesh])<br>NOT<br>("review"[pt] OR "Case Reports"[pt] OR "Clinical Trial"[pt] OR "Meta-Analysis"[pt] OR "Systematic Review"[pt] OR "letter"[pt] OR "editorial"[pt] OR "news"[pt])<br>Result: 4,339 hits                                                                                                                                                                                                                                                                                                                                                                                                                                                                 |
| EMBASE                                                                                                                                                                                                                                                                                                                                                                                                                                                                                                                                                                                                                                                                                                                                                                                                                                                                                                                                                              |
| (tb:ti,ab,kw OR "tuberculosis"/exp OR tuberculo*:ti,ab,kw)<br>AND<br>("lung cancer*":ti,ab,kw OR "lung tumor"/exp OR "lung tumor*":ti,ab,kw OR "lung tumour*":ti,ab,kw OR "lung neoplasm*":ti,ab,kw OR "lung carcinoma":ti,ab,kw OR "NSCLC":ti,ab,kw OR "non-small cell lung cancer"/exp OR "SCLC":ti,ab,kw OR "small cell lung cancer"/exp OR "lung adenocarcinoma":ti,ab,kw OR "lung adenocarcinoma"/exp)<br>NOT<br>("animal"/exp NOT "human"/exp)<br>NOT<br>(((“controlled clinical trial”/de OR “meta-analysis”/de OR “systematic review”/de OR “clinical trial”/de OR “case report”/de OR “diagnostic test accuracy study”/de) NOT (“cohort analysis”/de OR “cross sectional study”/de OR “observational study”/de OR “prospective study”/de OR “retrospective study”/de)) NOT (“conference abstract”:it OR “conference paper”:it OR “conference review”:it OR editorial:it OR note:it OR letter:it OR “short survey”:it OR “review”:it)<br>Result: 5,695 hits |
| Cochrane Database                                                                                                                                                                                                                                                                                                                                                                                                                                                                                                                                                                                                                                                                                                                                                                                                                                                                                                                                                   |
| (tb OR tuberculo* OR mycobacterium)<br>AND<br>("Lung cancer*" OR "Lung tumor*" OR "Lung tumour*" OR "lung neoplasm*" OR "lung carcinoma" OR NSCLC OR SCLC OR "lung adenocarcinoma")<br>Result: 135 hits                                                                                                                                                                                                                                                                                                                                                                                                                                                                                                                                                                                                                                                                                                                                                             |

**Table S2. Meta-regression analysis between pulmonary tuberculosis and lung cancer**

| Continuous variable     | All studies (n=33)     |                 |                | High-quality studies (n=8) |                 |                |
|-------------------------|------------------------|-----------------|----------------|----------------------------|-----------------|----------------|
|                         | Regression coefficient | <i>p</i> -value | No. of studies | Regression coefficient     | <i>p</i> -value | No. of studies |
| Mean age, years         | 0.949                  | < 0.001         | 27             | 0.945                      | < 0.001         | 7              |
| Female, %               | 0.999                  | 0.975           | 31             | 1.001                      | 0.949           | 8              |
| SCLC, %                 | 0.991                  | 0.302           | 15             | —                          | —               | 0              |
| LCLC, %                 | 0.965                  | 0.263           | 13             | —                          | —               | 0              |
| Adenocarcinoma, %       | 0.996                  | 0.367           | 17             | —                          | —               | 0              |
| Squamous cell cancer, % | 0.995                  | 0.532           | 16             | —                          | —               | 0              |
| Diabetes, %             | —                      | —               | 0              | —                          | —               | 0              |
| Hypertension, %         | —                      | —               | 0              | —                          | —               | 0              |
| COPD, %                 | 0.983                  | 0.196           | 19             | 0.970                      | 0.260           | 7              |
| Non-smoker, %           | 1.006                  | 0.115           | 17             | 1.008                      | 0.156           | 4              |
| Ever smoker, %          | 0.994                  | 0.115           | 17             | 0.993                      | 0.156           | 4              |

Abbreviations: COPD, chronic obstructive pulmonary diseases; LCLC, large cell lung cancer; No, number; SCLC, small cell lung cancer.
